# Supplementary material for: Efficient non-metal based conducting polymers for photocatalytic hydrogen production: comparative study between polyaniline, polypyrrole and PEDOT
Source: Royal Society of Chemistry journal article supplement (doi:10.1039/d1ra01218e), 2021-01-01
Supplement: d1ra01218e1.pdf [file d1ra01218e1.pdf]

**Efficient non-metal based conducting polymers for photocatalytic  
hydrogen production: comparative study between polyaniline,  
polypyrrole and PEDOT**

**Haitham M. El-Bery<sup>1\*</sup>, Mahmoud R. Salah<sup>1</sup>, Seddique M. Ahmed,<sup>2</sup> Soliman A.  
Soliman<sup>2</sup>**

<sup>1</sup>Advanced Functional Materials Laboratory, Chemistry Department, Faculty of Science,  
Assiut University, Assiut 71515, Egypt.

<sup>2</sup>Chemistry Department, Faculty of Science, Assiut University, Assiut 71515, Egypt.

**\*Corresponding Author Email: [Haitham.El-Bery@aun.edu.eg](mailto:Haitham.El-Bery@aun.edu.eg)**

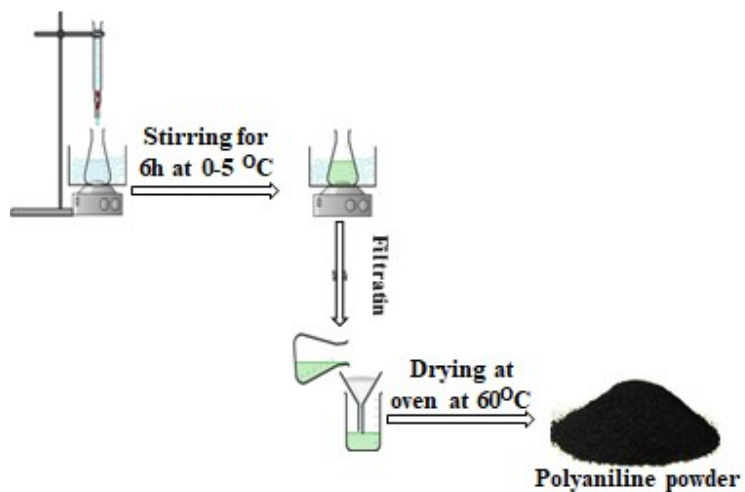

**Fig.S1** Systematic illustration of stepwise preparation of PAn and PPy

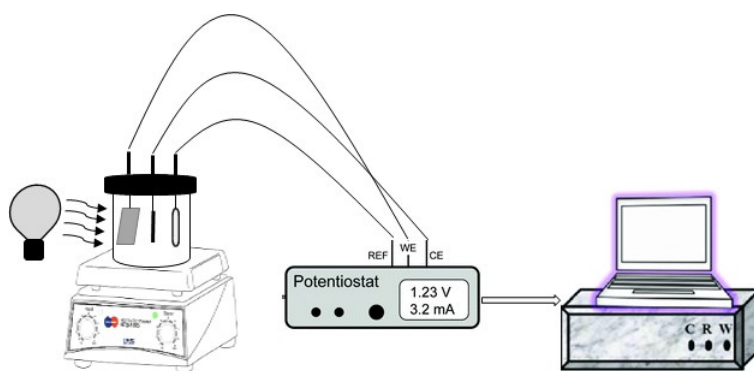

**Fig.S2** the simulated apparatus of photoelectrochemical measurements

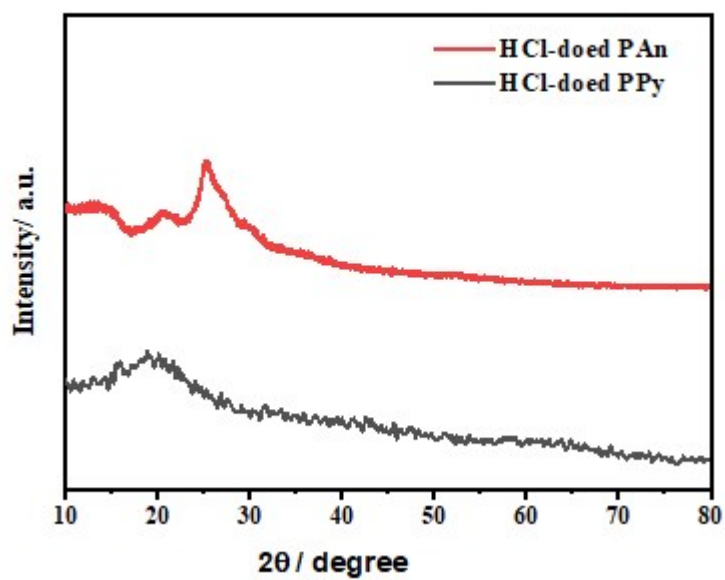

**Fig.S3** The XRD of polyaniline doped HCl and polypyrrole doped HCl.

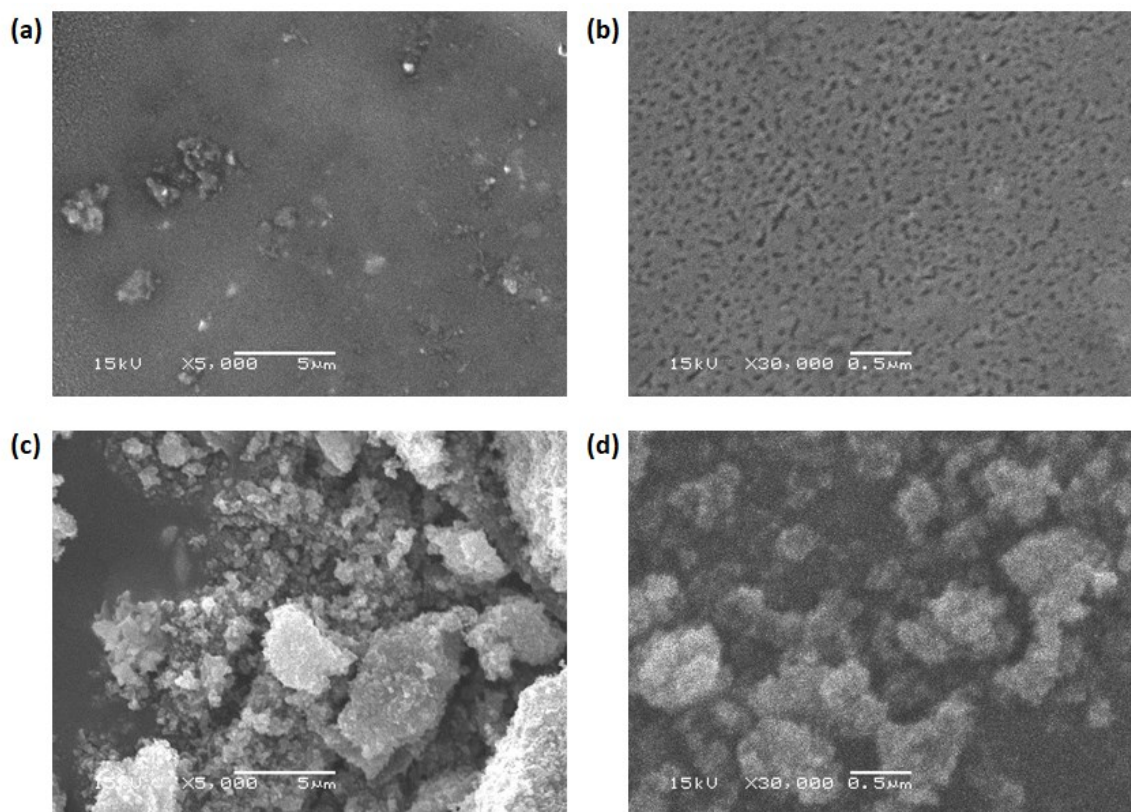

**Fig.S4** SEM images (a, b) of PAN powder (c, d) TiO<sub>2</sub>@5PAN composites.

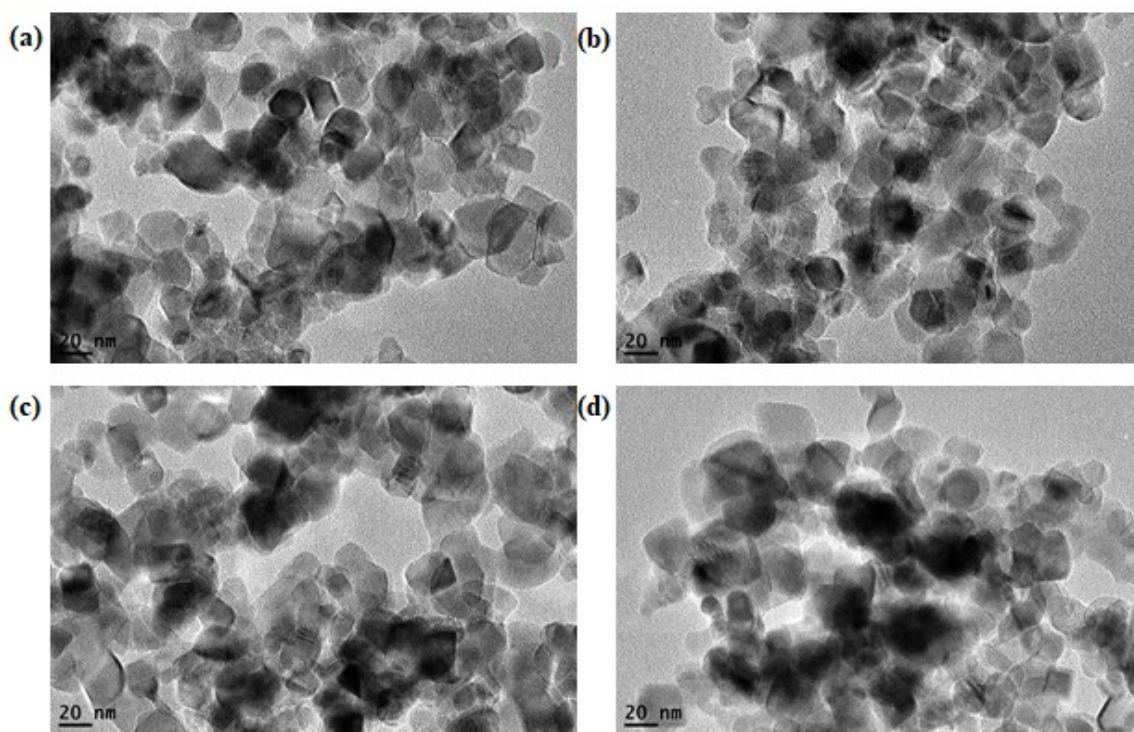

**Fig.S5** Low magnification TEM images of (a)TiO<sub>2</sub>, (b)TiO<sub>2</sub>@2PEDOT, (c)TiO<sub>2</sub>@2PPy, and (d)TiO<sub>2</sub>@5PAn

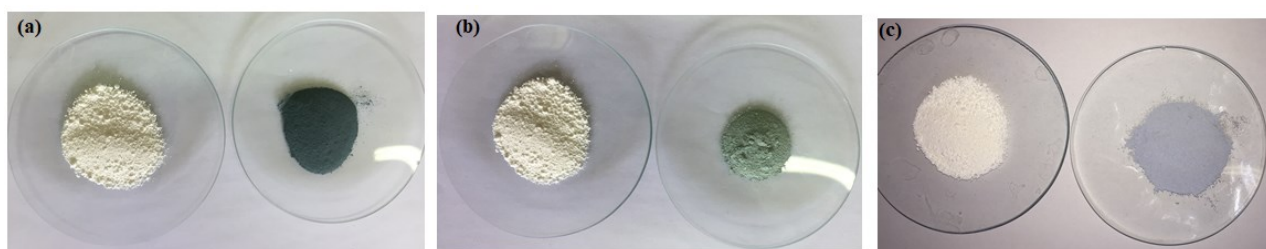

**Fig.S6** The TiO<sub>2</sub>@5PAn (a), TiO<sub>2</sub>@2PEDOT (b), and TiO<sub>2</sub>@2PPy(c) compared to bare TiO<sub>2</sub>.

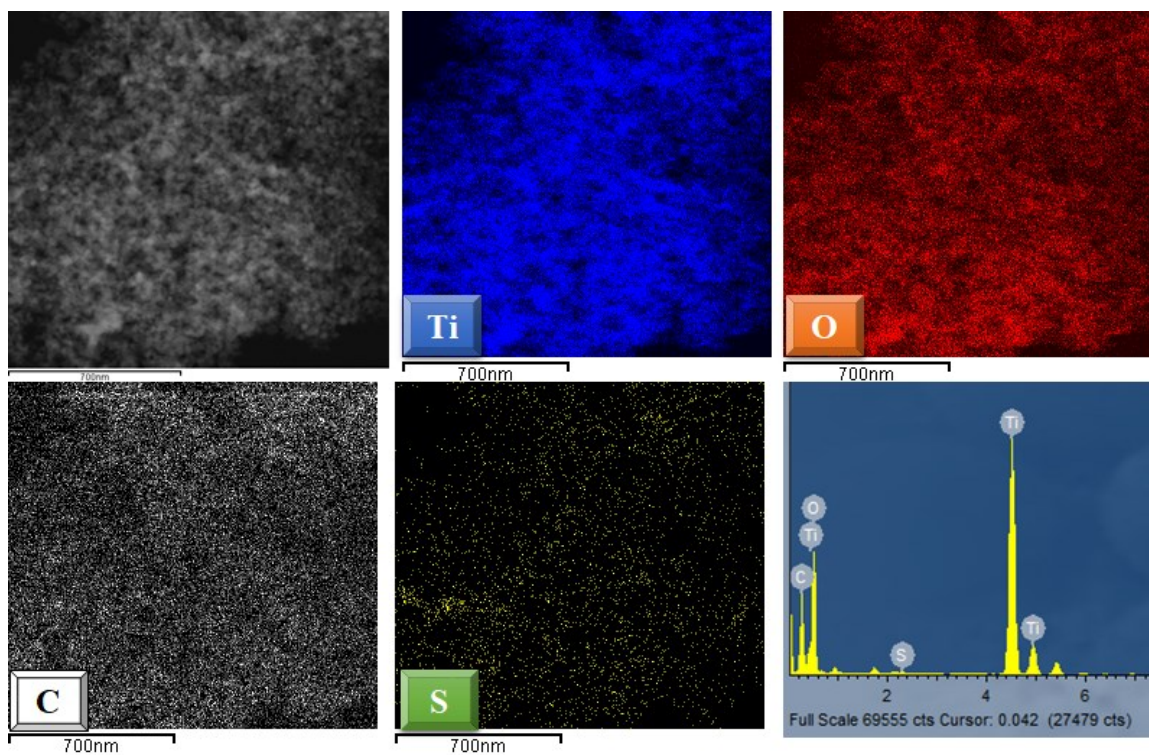

**Fig. S7.** EDX spectrum and elemental mapping of Ti, O, C, and S of TiO<sub>2</sub>@2PEDOT nanocomposites.



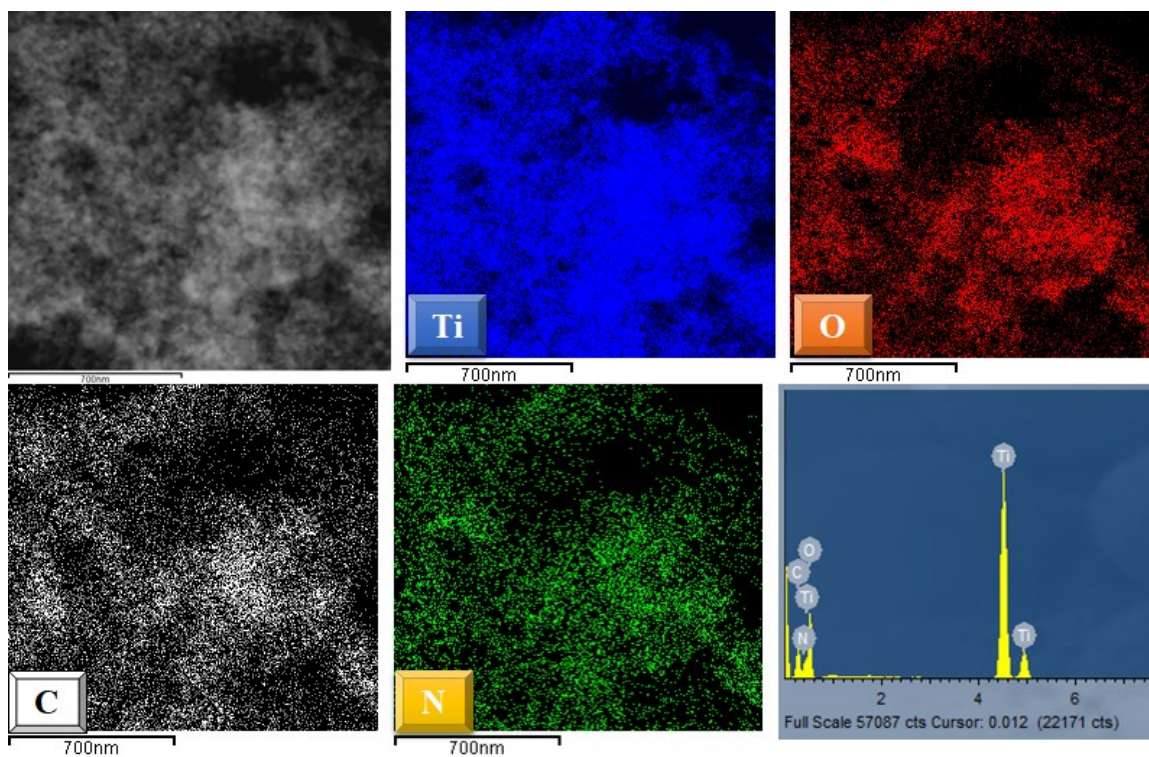

**Fig. S8.** EDX spectrum and elemental mapping of Ti, O, C, and N of TiO<sub>2</sub>@2PPy nanocomposites.

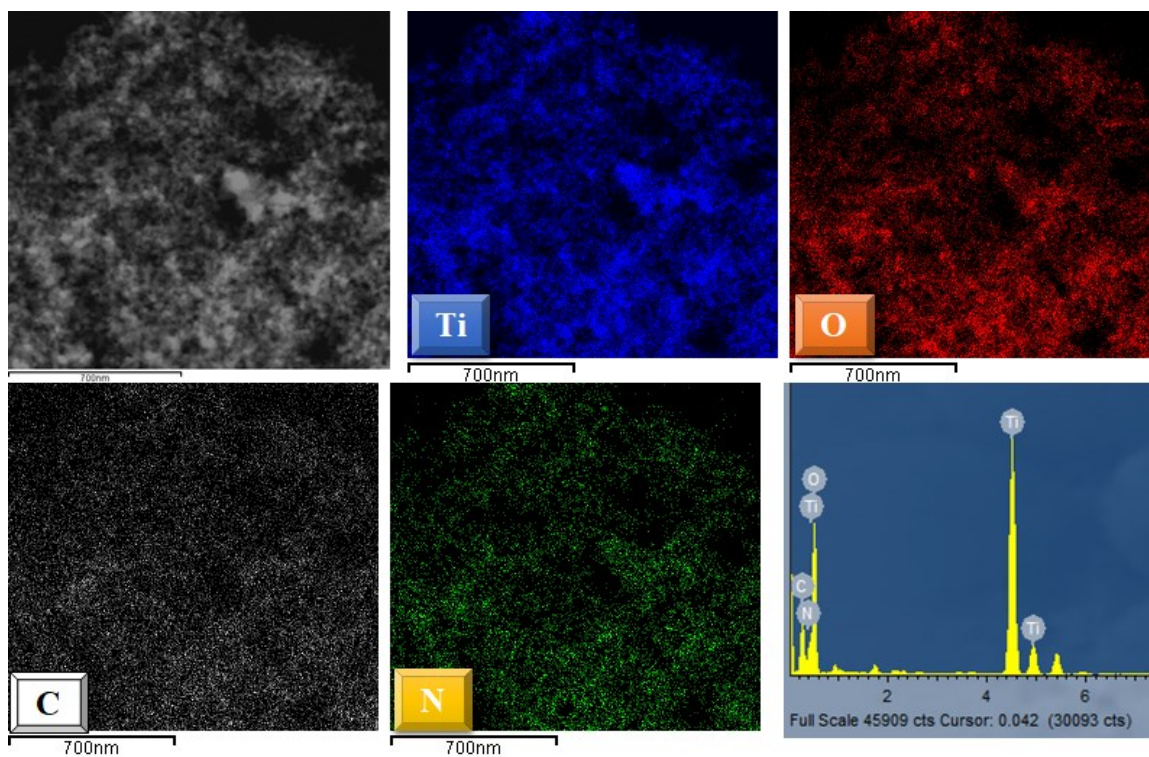

**Fig. S9.** EDX spectrum and elemental mapping of Ti, O, C, and N of TiO<sub>2</sub>@5PAn nanocomposites.

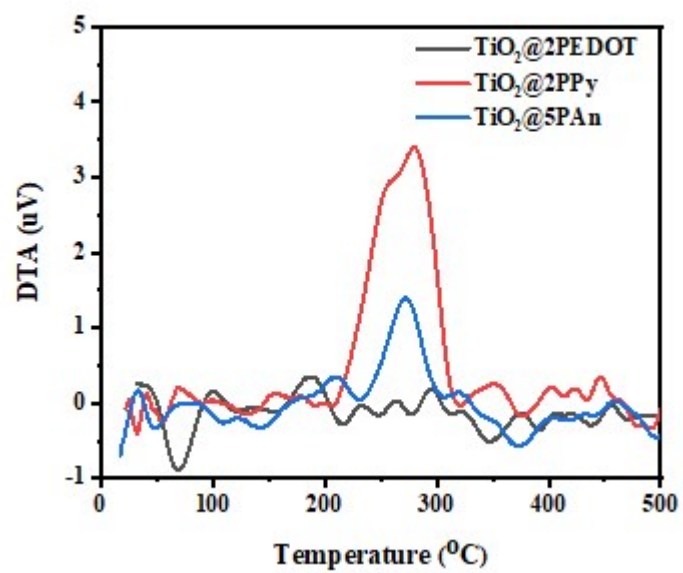

**Fig.S10** The DTA curves TiO<sub>2</sub>@2PEDOT, (c) TiO<sub>2</sub>@2PPy, and (d) TiO<sub>2</sub>@5PAn nanocomposites



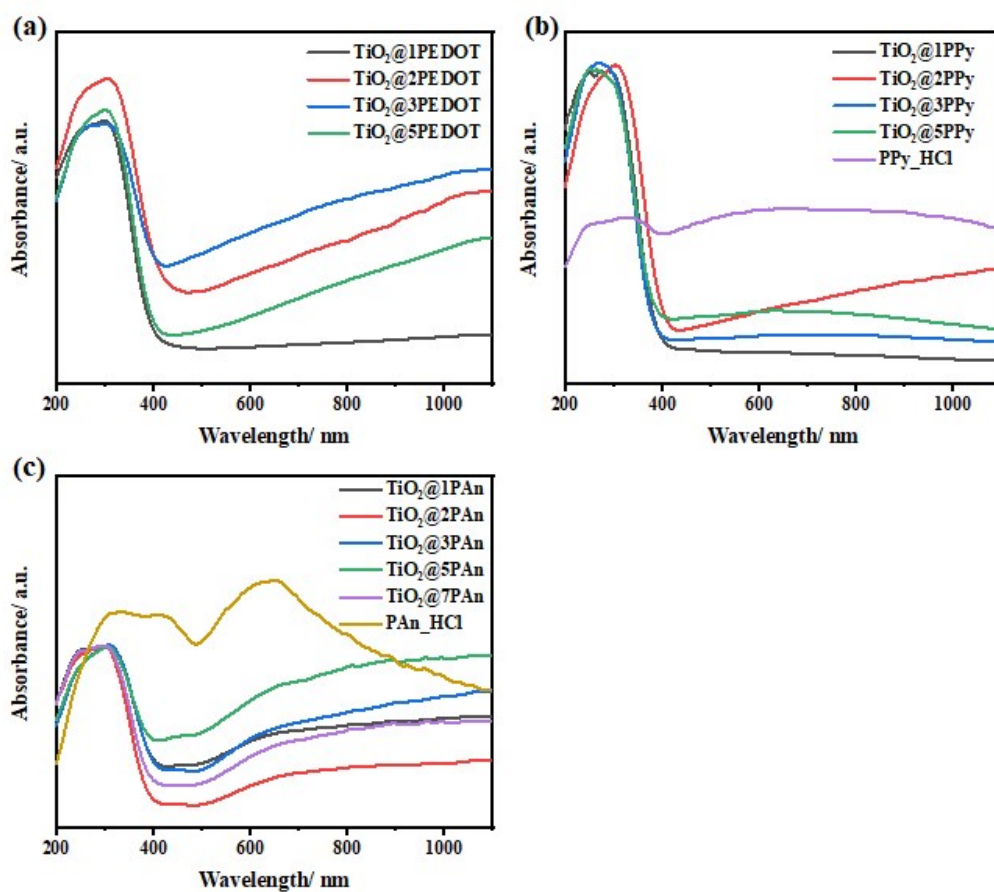

**Fig.S11** The DRS curves (a) series of TiO<sub>2</sub>@PEDOT (b) series of TiO<sub>2</sub>@PPy, and (c) series of TiO<sub>2</sub>@PAn composites.

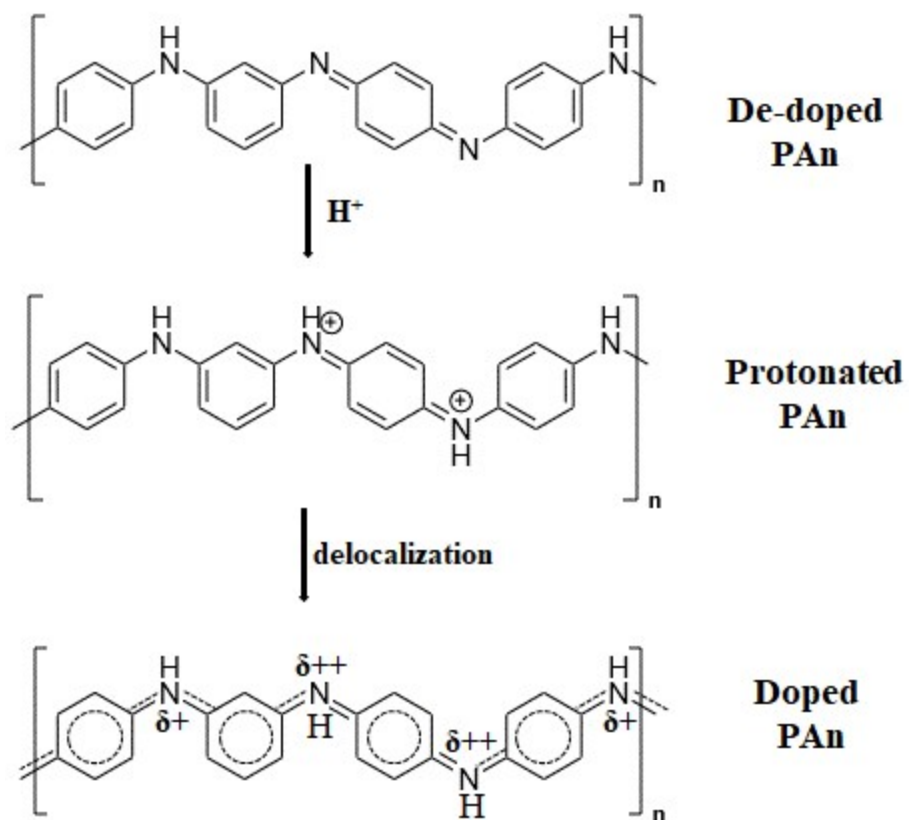

**Fig. S12.** The doping mechanism of PAN by protonic acids

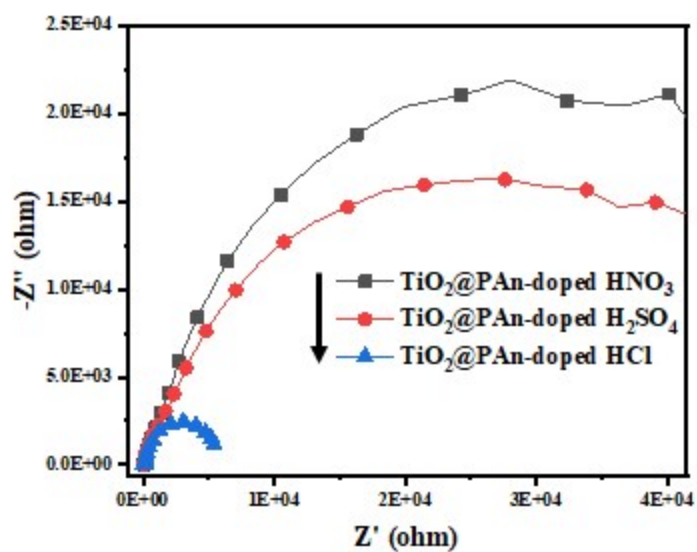

**Fig. S13.** The electrochemical impedance spectroscopy (EIS) measured under light irradiation of  $\text{TiO}_2@PAn$  prepared by various counterions.

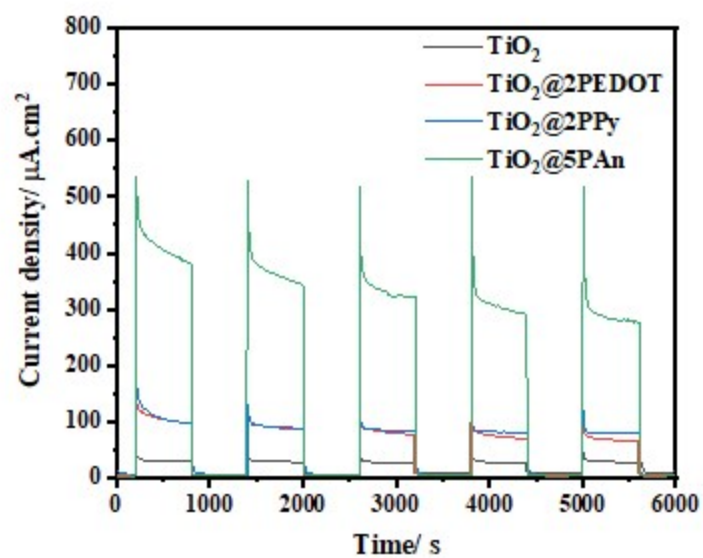

**Fig.S14** Transient photocurrent response (I-t) curves of  $\text{TiO}_2$ ,  $\text{TiO}_2@2\text{PEDOT}$ ,  $\text{TiO}_2@2\text{PPy}$  and  $\text{TiO}_2@5\text{PAn}$  photocatalysts.

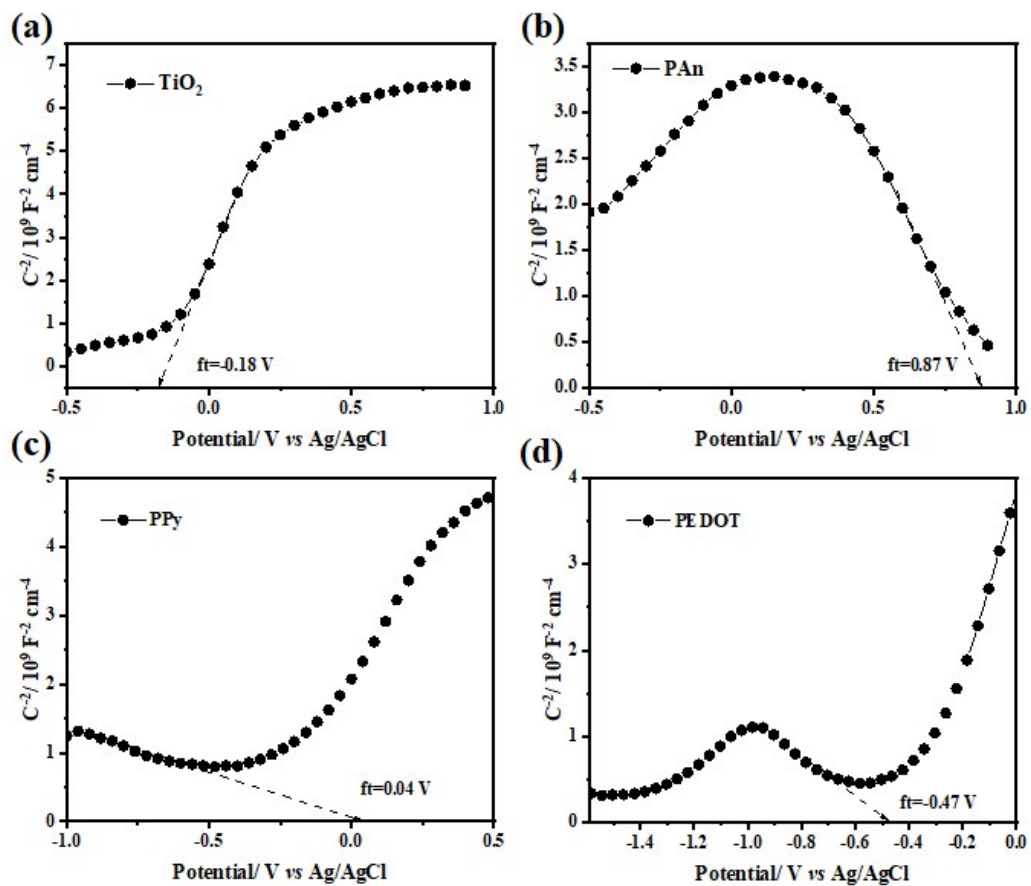

**Fig. S15** The Mott- Schottky plots of  $\text{TiO}_2$ , PAn, PPy, and PEDOT.



**Table S1:** Charge transfer properties at TiO<sub>2</sub>@CPs /electrolyte interface from EIS data

| Photocatalyst           | Serial resistance  | Interfacial resistance |
|-------------------------|--------------------|------------------------|
|                         | R <sub>s</sub> (Ω) | R <sub>ct</sub> (Ω)    |
| TiO <sub>2</sub>        | 34.66              | 9.14 x10 <sup>4</sup>  |
| TiO <sub>2</sub> @PEDOT | 28.60              | 1.35 x10 <sup>4</sup>  |
| TiO <sub>2</sub> @PPy   | 35.53              | 3.60 x10 <sup>4</sup>  |
| TiO <sub>2</sub> @PAn   | 22.39              | 1.03 x10 <sup>2</sup>  |
